# Supplementary material for: Nutritional conditions regulate transcriptional activity of SF-1 by controlling sumoylation and ubiquitination
Source: PubMed Central journal article supplement (PMC4707483; doi:10.1038/srep19143), 2016-01-11
Supplement: srep19143-s1.pdf [file srep19143-s1.pdf]

## Supplementary information

### **Nutritional conditions regulate transcriptional activity of SF-1 by controlling sumoylation and ubiquitination.**

Jiwon Lee<sup>1,†</sup>, Dong Joo Yang<sup>2</sup>, Syann Lee<sup>1</sup>, Gary D. Hammer<sup>3</sup>, Ki Woo Kim<sup>2</sup> & Joel K. Elmquist<sup>1</sup>

<sup>1</sup>Departments of Pharmacology and Internal Medicine, Division of Hypothalamic Research, University of Texas Southwestern Medical Center, Dallas, Texas 75390, USA, <sup>2</sup>Departments of Pharmacology and Global Medical Science, Institute of Lifestyle Medicine and Nuclear Receptor Research Consortium, Wonju College of Medicine, Yonsei University, Wonju, 26426, South Korea, <sup>3</sup>Endocrine Oncology Program, Center for Organogenesis, University of Michigan Health System, Ann Arbor, Michigan 48109, USA. †Current address: Department of Anatomy and Cell Biology, Samsung Biomedical Research Institute, Sungkyunkwan University School of Medicine, Suwon, 16419, South Korea.

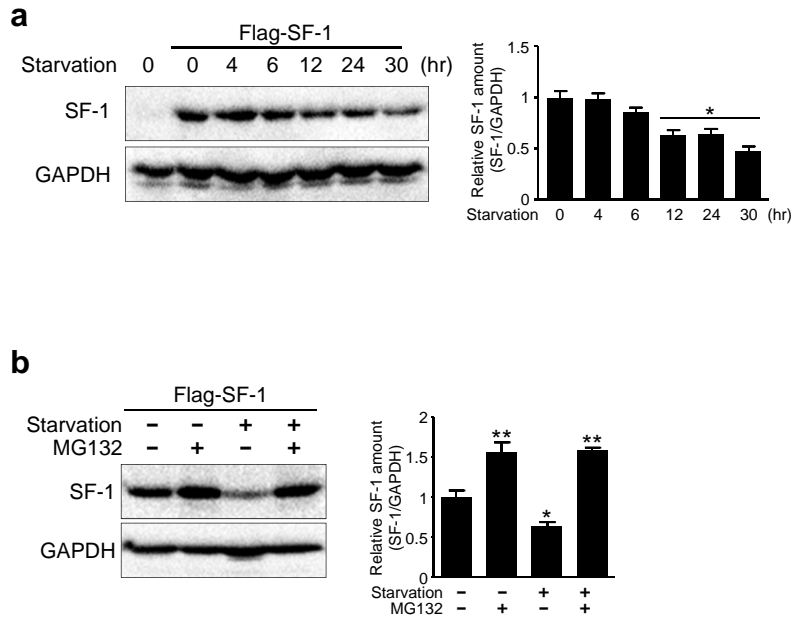

**Supplementary Figure S1. Serum starvation induces ubiquitin-dependent degradation of SF-1 in Neuro2A cells.** (a) Temporal regulation of SF-1 after starvation ( $*P < 0.05$ ). (b) Proteasome inhibitor MG132 blocks SF-1 degradation. MG132 was treated at 25  $\mu$ M for 12 hours. The values are presented as the mean  $\pm$  SEM from three independent experiments ( $*P < 0.05$ ,  $**P < 0.01$  vs. control group).

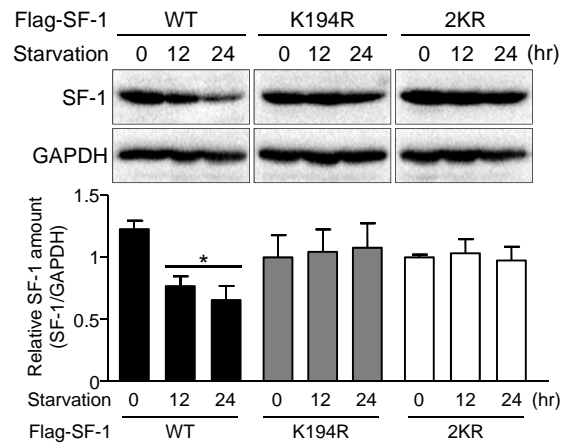

**Supplementary Figure S2. Serum starvation induces sumoylation-dependent degradation of SF-1 in Neuro2A cells.** Decreased starvation-induced degradation in sumoylation-defective SF-1 mutants. The values are presented as the mean  $\pm$  SEM from three independent experiments ( $*P < 0.05$ ).

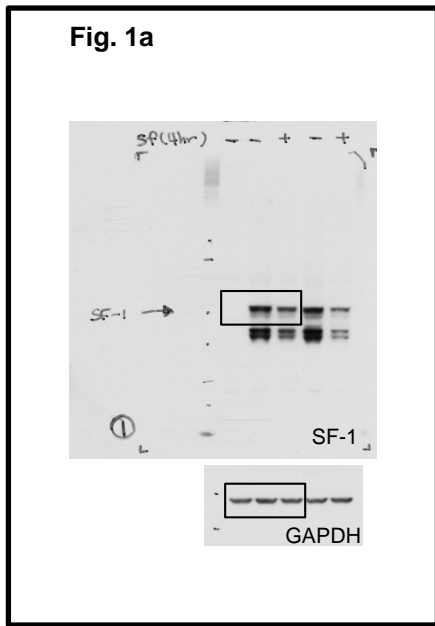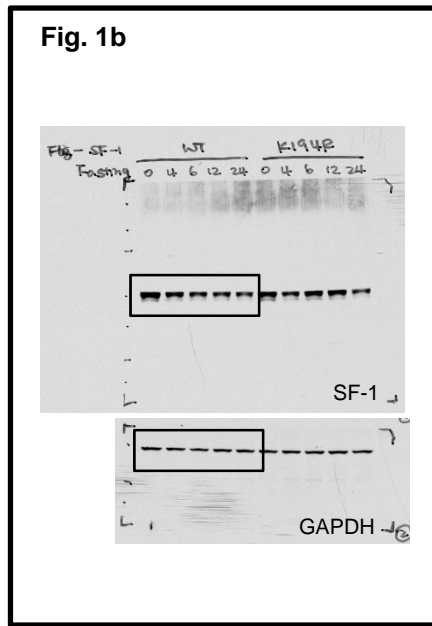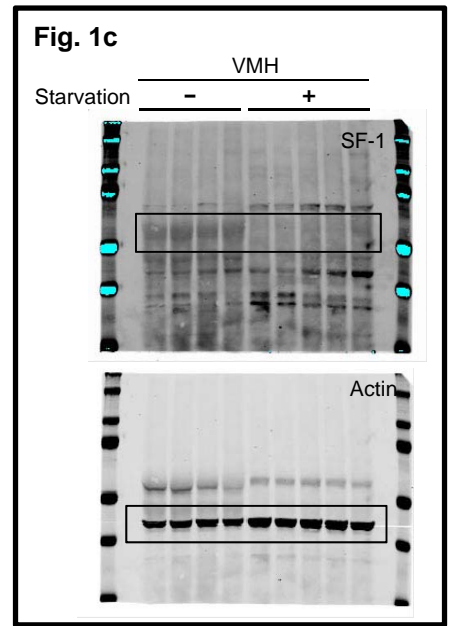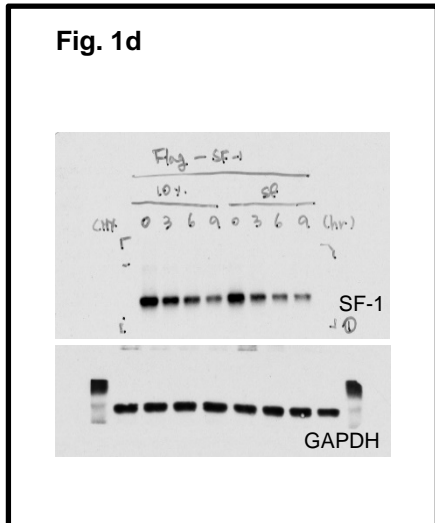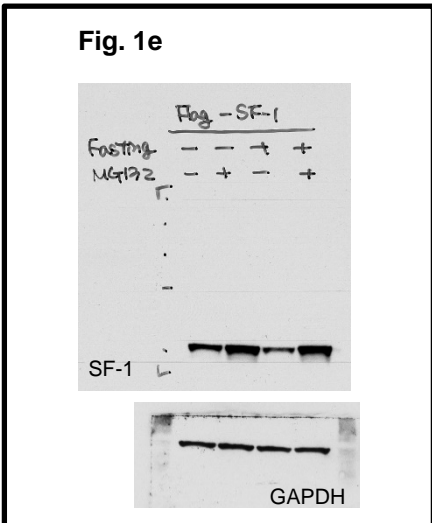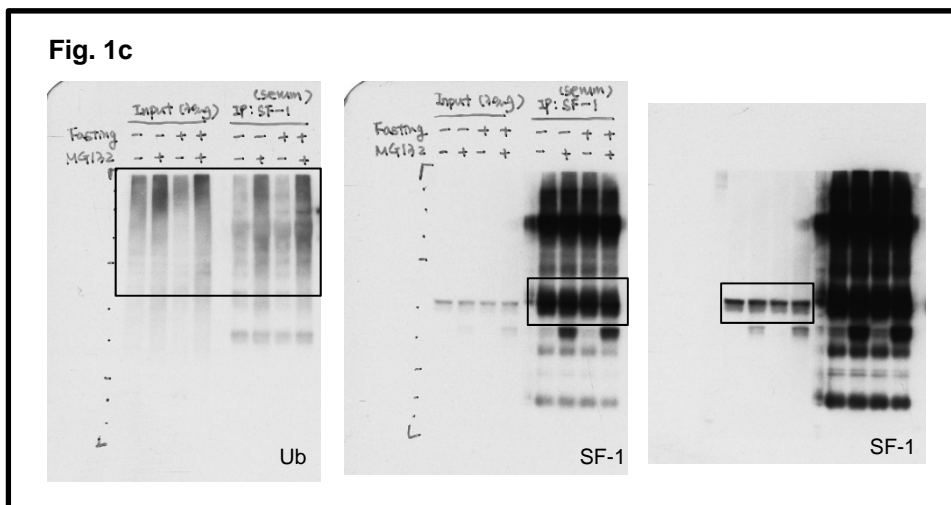

Supplementary Figure S3. Uncropped Western blot for the data in Figure 1.

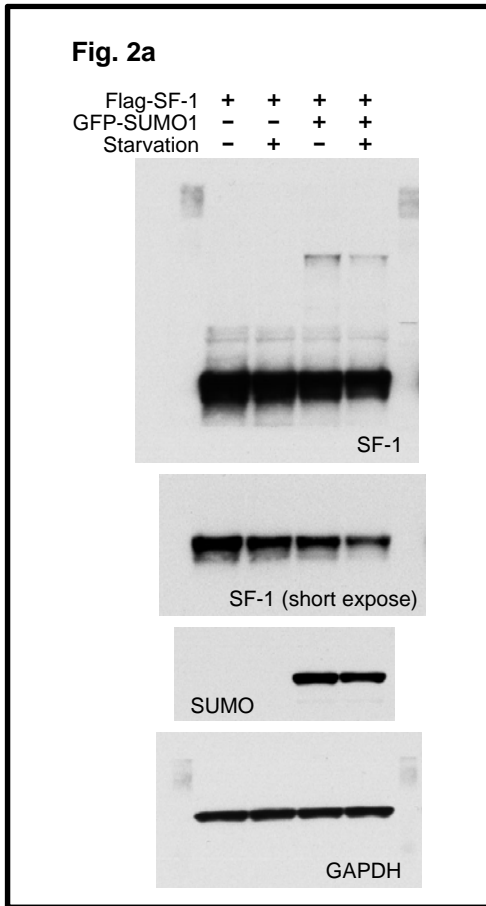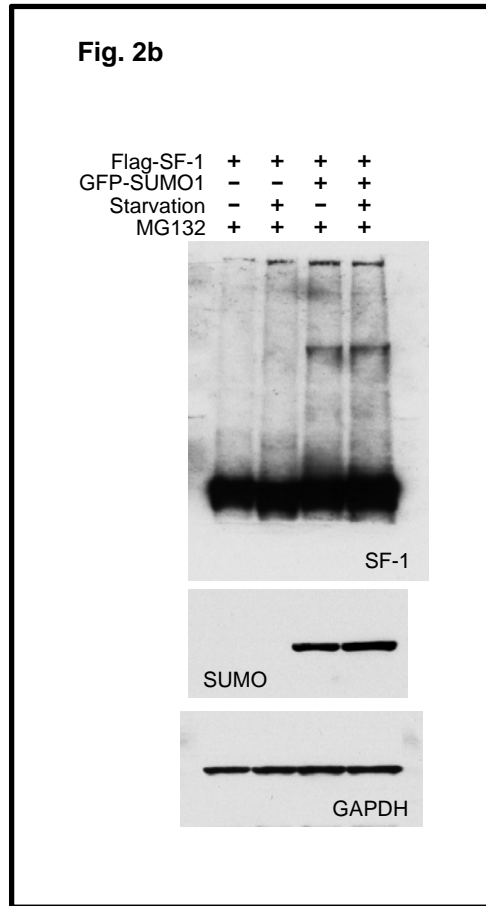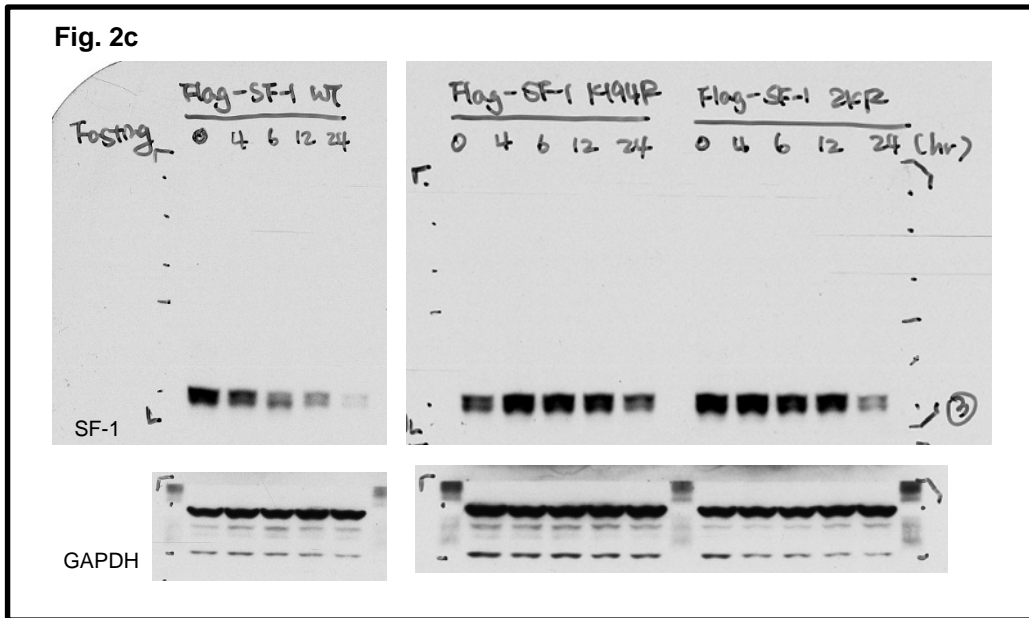

**Supplementary Figure S4.** Uncropped Western blot for the data in Figure 2.

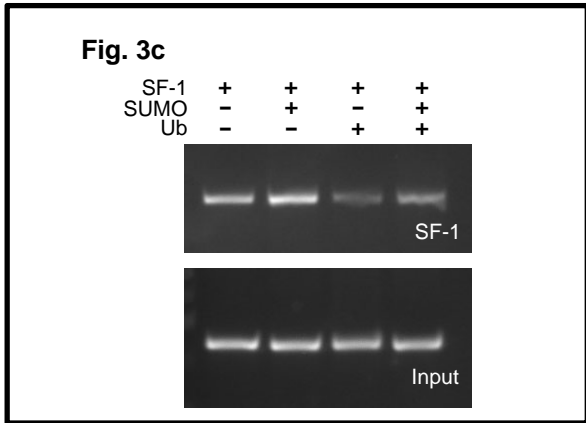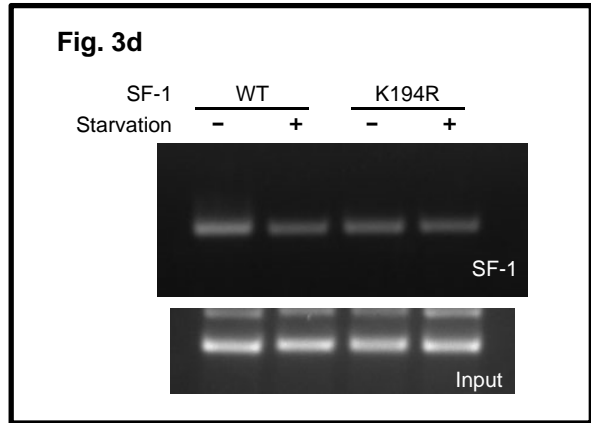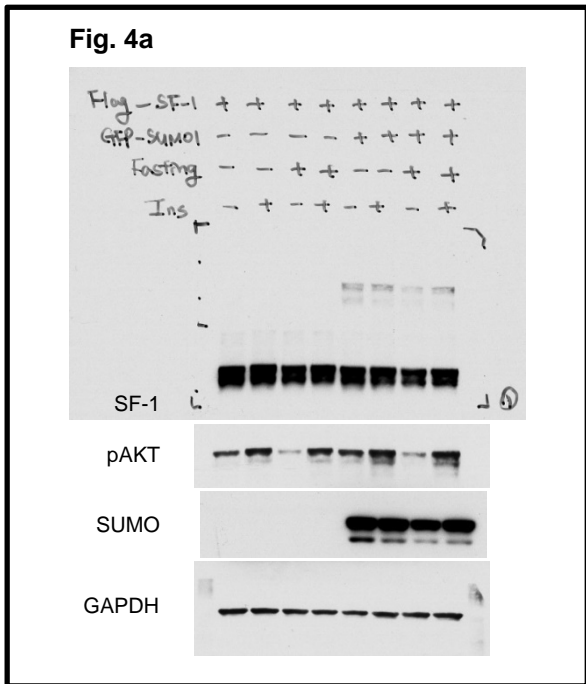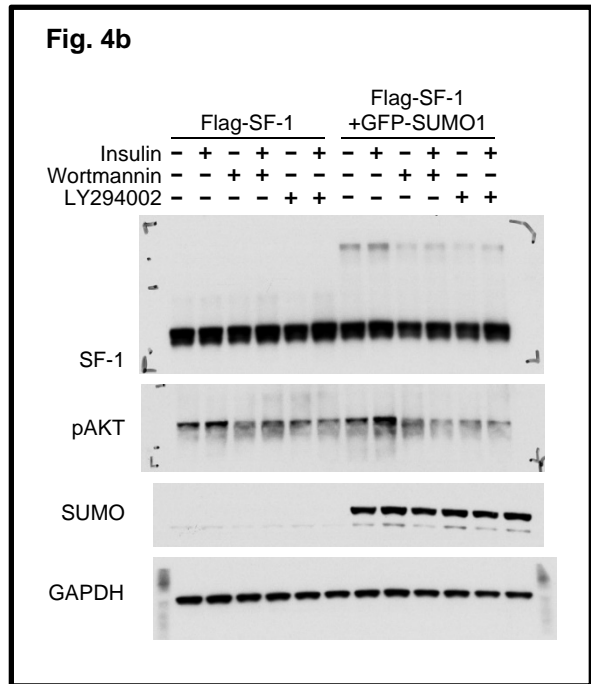

**Supplementary Figure S5.** Uncropped gel image and Western blot for the data in Figure 3 and 4.
